# Supplementary material for: The importance of timescale for hydrogen bonding in imidazolium chloride ionic liquids
Source: Royal Society of Chemistry journal article supplement (doi:10.1039/c3cp54551b), 2014-01-01
Supplement: c3cp54551b.pdf [file c3cp54551b.pdf]

# The Importance of Timescale for Hydrogen Bonding in Imidazolium Chloride Ionic Liquids.

Ioannis Skarmoutsos, Tom Welton and Patricia A. Hunt

Department of Chemistry, Imperial College London, London, SW7 2AZ, United Kingdom

Additional definitions of time correlation functions (TCFs), used to prepare Figure 8 of the main Paper. Starting from the  $t=0$  state where the HB-criterion has been applied, the individual component  $x=R_{H\dots Cl}$ ,  $R_{C\dots Cl}$  and  $\phi \angle H-C-Cl$  criteria have been applied at  $t=t$  to generate *individual* TCFs  $C_{HB}^x(t)$ , which contribute to the (overall) H-bond TCF.

$$C_{HB}^x(t) = \frac{\langle h_{ij}^x(0) \times h_{ij}^x(t) \rangle_{t^*}}{\langle h_{ij}^x(0)^2 \rangle} \quad C_{HB(n)}^I(t) = \frac{\langle dh_n(0) \times dh_n(t) \rangle_{t^*}}{\langle dh_n(0)^2 \rangle} \quad dh_n(t) = h_n(t) - \langle h_n(t) \rangle$$

Thus  $h_{ij}^x(t) = 1$  if the distance  $R_{H\dots Cl}$  (or distance  $R_{C\dots Cl}$  or angle  $\phi \angle H-C-Cl$ ) at time  $t=0$ , is less than or equal to the cut-off value employed for the H-bonding criterion (using an angular cut-off of  $30^\circ$ ), and the distance or angle has not exceeded the cut-off value for a period longer than  $t^*=0$  in which case  $h_{ij}^x(t) = 0$ . In addition, the TCFs for the H-bond state dynamics,  $C_{HB(n)}^I(t)$ , presented in Figure 10 have been calculated using the definition presented above and in Ref. 68 from the main paper.

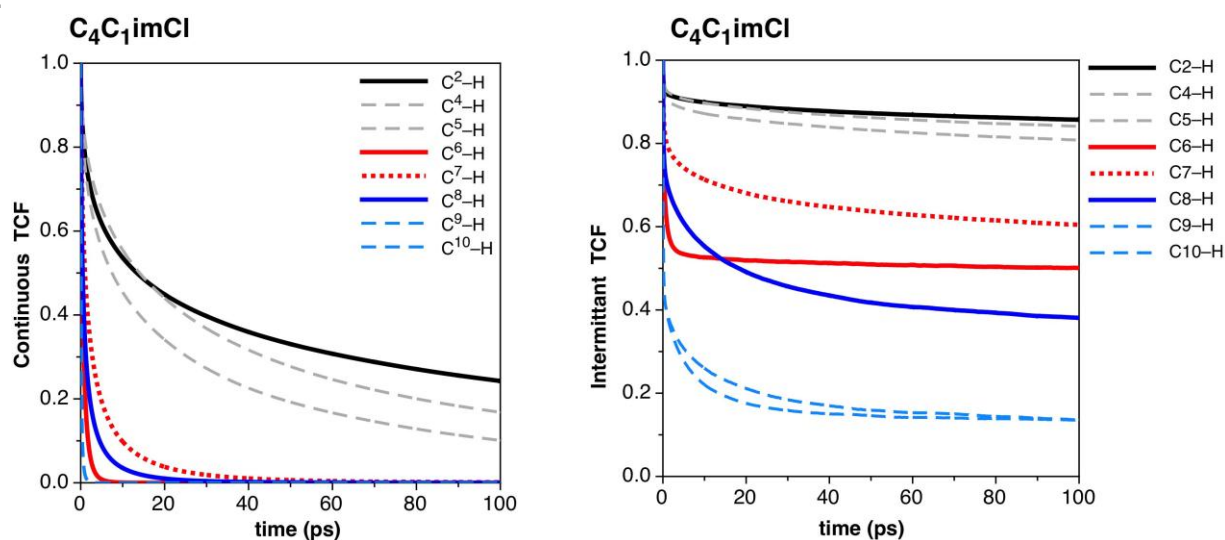

Figure F1 (a) Continuous and (b) intermittent residence TCFs for  $[C_4C_1im]Cl$ . Black and grey are ring C-H, red are first C-H and blue are alkyl C-H.

| H-atom | c1      | c2      | $\tau_1$ | $\tau_2$ | $\tau_3$   |
|--------|---------|---------|----------|----------|------------|
| C2-H   | 0.09316 | 0.04928 | 0.29326  | 66.73381 | 6442.50647 |
| C4-H   | 0.11746 | 0.08034 | 0.46206  | 73.05993 | 4996.36556 |
| C5-H   | 0.09593 | 0.06746 | 0.65406  | 80.07079 | 5378.54283 |
| C6-H   | 0.46440 | 0.03357 | 0.41237  | 49.93836 | 6657.17580 |
| C7-H   | 0.25295 | 0.14094 | 0.53165  | 40.87189 | 3305.20445 |
| C8-H   | 0.34507 | 0.26897 | 0.35860  | 24.47911 | 2636.96111 |
| C9-H   | 0.63470 | 0.22155 | 0.12099  | 18.65015 | 1137.27163 |
| C10-H  | 0.60798 | 0.24773 | 0.11353  | 9.316560 | 1399.78351 |

Table T1 Parameters for the exponential fit ( $C(t) = c_1 \exp(-t/\tau_1) + c_2 \exp(-t/\tau_2) + (1 - c_1 - c_2) \exp(-t/\tau_3)$ ) to the intermittent residence TCFs for  $[C_4C_1im]Cl$ .

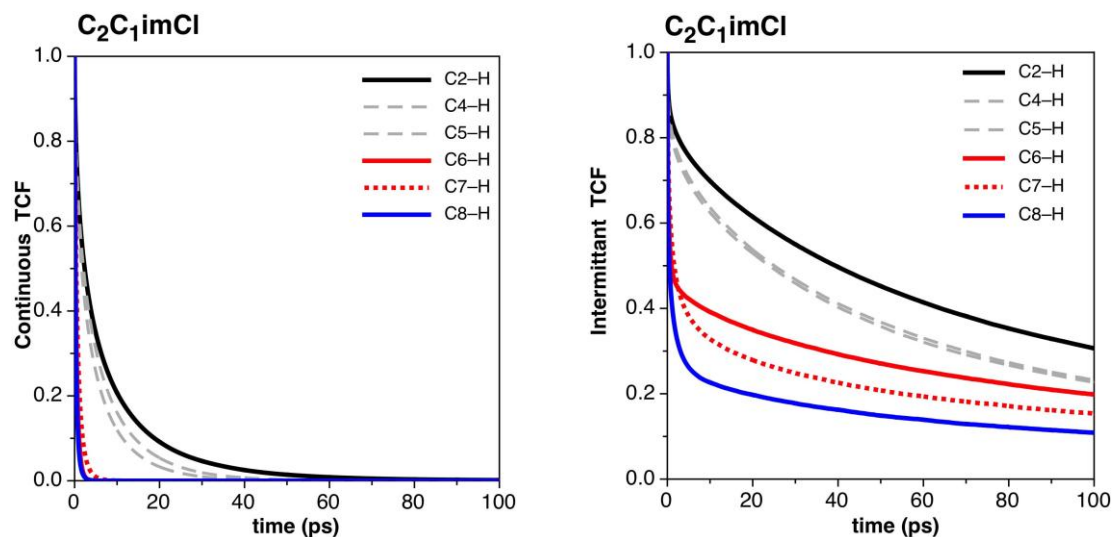

Figure F2 (a) Continuous and (b) intermittent residence TCFs for  $[C_2C_1im]Cl$ . Black and grey are ring C-H, red are first C-H and blue are alkyl C-H.

|                   | $c_1$   | $c_2$   | $\tau_1$ | $\tau_2$ | $\tau_3$  |
|-------------------|---------|---------|----------|----------|-----------|
| C <sup>2</sup> -H | 0.21195 | 0.50136 | 0.97644  | 55.11665 | 383.56014 |
| C <sup>4</sup> -H | 0.25902 | 0.48151 | 0.85079  | 40.65351 | 282.71207 |
| C <sup>5</sup> -H | 0.25211 | 0.49673 | 1.06527  | 42.65733 | 308.00967 |
| C <sup>6</sup> -H | 0.55517 | 0.21305 | 0.31668  | 45.26675 | 340.27127 |
| C <sup>7</sup> -H | 0.58992 | 0.21142 | 0.74235  | 27.11275 | 324.3122  |
| C <sup>8</sup> -H | 0.70591 | 0.14661 | 0.45182  | 25.1938  | 290.62338 |

Table T2 Parameters for the exponential fit ( $C(t) = c_1 \exp(-t/t_1) + c_2 \exp(-t/t_2) + (1 - c_1 - c_2) \exp(-t/t_3)$ ) to the intermittent residence TCFs for  $[C_2C_1im]Cl$ .

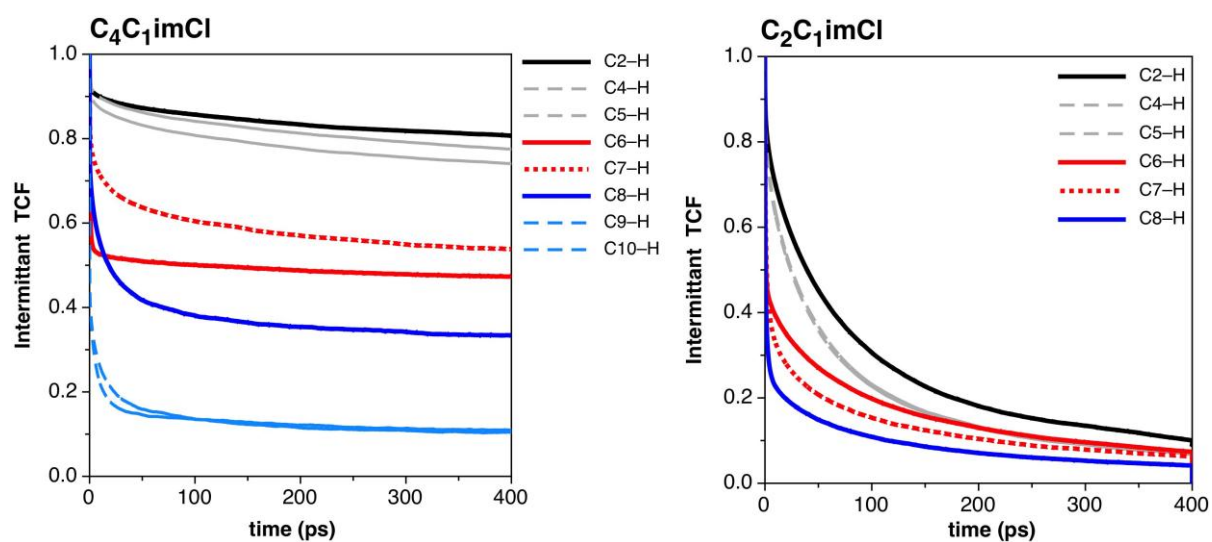

Figure F3 Long time intermittent TCFs for (a)  $[C_4C_1im]Cl$  and (b)  $[C_2C_1im]Cl$ . Black and grey are ring C-H, red are first C-H and blue are alkyl C-H.

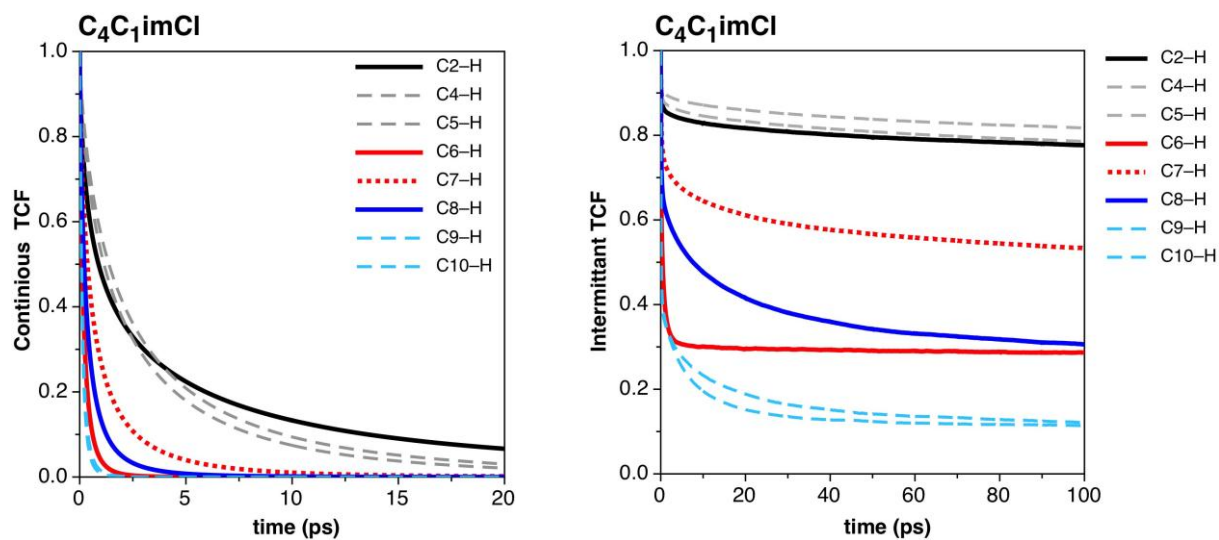

Figure F4 (a) Continuous and (b) intermittent H-bond TCFs for  $[C_4C_1im]Cl$ . Black and grey are ring C-H, red are first C-H and blue are alkyl C-H.

| H-atom             | $c_1$   | $c_2$   | $\tau_1$ | $\tau_2$ | $\tau_3$   |
|--------------------|---------|---------|----------|----------|------------|
| C <sup>2</sup> -H  | 0.15883 | 0.06482 | 0.20234  | 58.08314 | 6027.78672 |
| C <sup>4</sup> -H  | 0.14014 | 0.07027 | 0.2418   | 57.39527 | 4285.21455 |
| C <sup>5</sup> -H  | 0.11574 | 0.0567  | 0.26773  | 51.09677 | 4128.78632 |
| C <sup>6</sup> -H  | 0.40824 | 0.29764 | 0.08451  | 1.04379  | 4458.81171 |
| C <sup>7</sup> -H  | 0.30839 | 0.14579 | 0.32754  | 32.12979 | 2307.91593 |
| C <sup>8</sup> -H  | 0.40802 | 0.27149 | 0.2246   | 21.5083  | 1553.47059 |
| C <sup>9</sup> -H  | 0.64496 | 0.20045 | 0.09338  | 12.00476 | 441.01373  |
| C <sup>10</sup> -H | 0.60791 | 0.25017 | 0.09636  | 6.76139  | 407.40945  |

Table T3 Parameters for the exponential fit ( $C(t) = c_1 \exp(-t/t_1) + c_2 \exp(-t/t_2) + (1 - c_1 - c_2) \exp(-t/t_3)$ ) to the intermittent H-bond TCFs for  $[C_4C_1im]Cl$ , 60° angular cut-off.

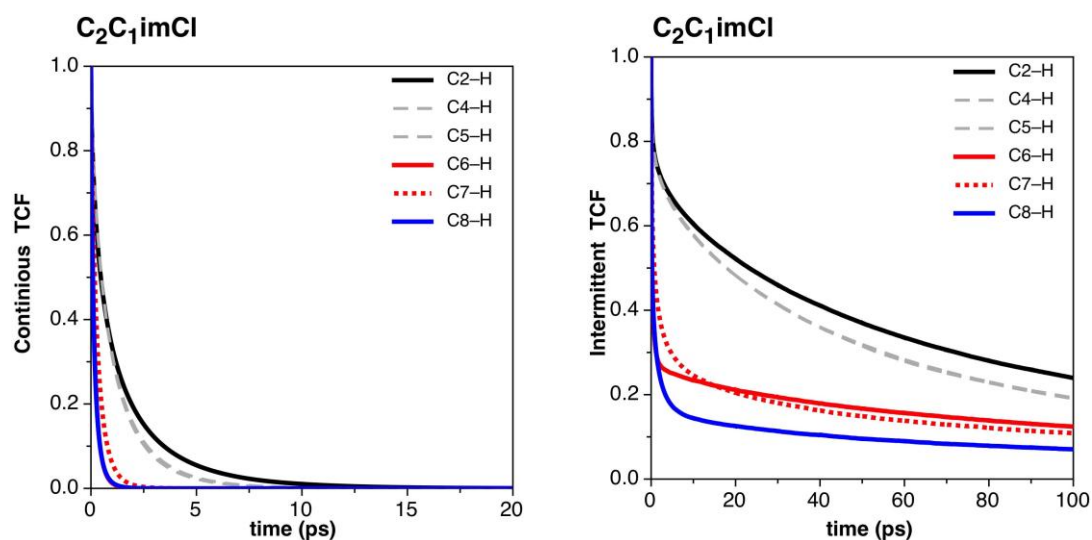

Figure F5 (a) Continuous and (b) intermittent H-bond TCFs for  $[C_2C_1im]Cl$ . Black and grey are ring C-H, red are first C-H and blue are alkyl C-H.

|                   | $c_1$   | $c_2$   | $\tau_1$ | $\tau_2$ | $\tau_3$  |
|-------------------|---------|---------|----------|----------|-----------|
| C <sup>2</sup> -H | 0.30078 | 0.46824 | 0.59403  | 49.59836 | 343.06931 |
| C <sup>4</sup> -H | 0.3013  | 0.47434 | 0.57277  | 38.56703 | 254.82172 |
| C <sup>5</sup> -H | 0.30184 | 0.48243 | 0.6381   | 39.80561 | 277.06233 |
| C <sup>6</sup> -H | 0.73358 | 0.11844 | 0.22746  | 44.55992 | 341.65263 |
| C <sup>7</sup> -H | 0.6579  | 0.19201 | 0.5169   | 19.85986 | 296.69665 |
| C <sup>8</sup> -H | 0.6657  | 0.21582 | 0.18041  | 4.5518   | 226.95897 |

Table T4 Parameters for the exponential fit ( $C(t) = c_1 \exp(-t/t_1) + c_2 \exp(-t/t_2) + (1 - c_1 - c_2) \exp(-t/t_3)$ ) to the intermittent H-bond TCFs for  $[C_2C_1im]Cl$ , 60° angular cut-off.

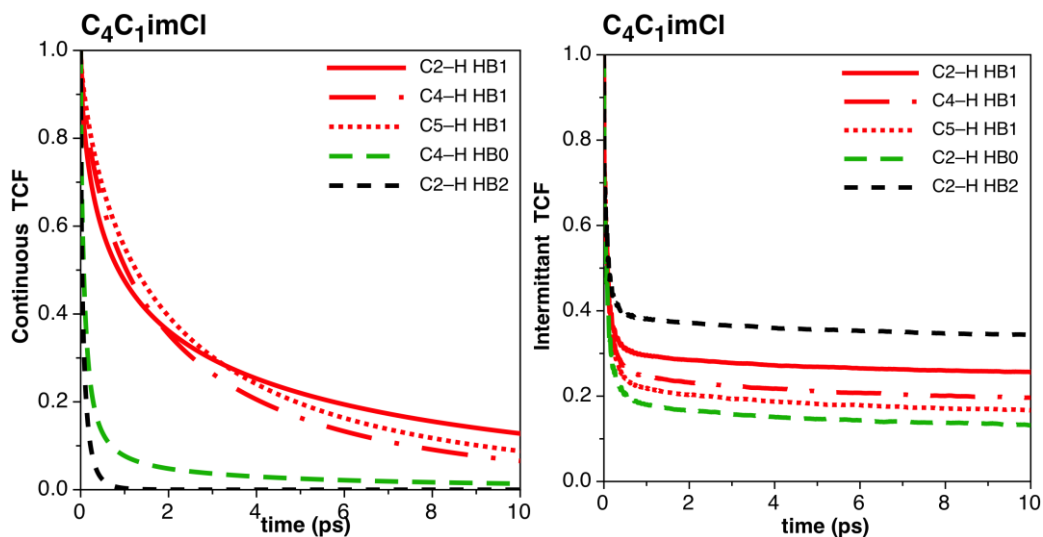

Figure F6 (a) Continuous and (b) intermittent H-bond state TCFs for  $[C_4C_1im]Cl$ .

|                   |              | $c_1$   | $c_2$   | $\tau_1$ | $\tau_2$ | $\tau_3$  |
|-------------------|--------------|---------|---------|----------|----------|-----------|
| C <sup>2</sup> -H | $n_{HB} = 0$ | 0.80194 | 0.07362 | 0.06549  | 5.17907  | 212.77892 |
|                   | $n_{HB} = 1$ | 0.69191 | 0.06022 | 0.05611  | 5.97582  | 519.94817 |
|                   | $n_{HB} = 2$ | 0.60909 | 0.05648 | 0.0553   | 6.79116  | 672.94646 |
| C <sup>4</sup> -H | $n_{HB} = 0$ | 0.74887 | 0.07528 | 0.09359  | 7.10524  | 215.61573 |
|                   | $n_{HB} = 1$ | 0.74481 | 0.06746 | 0.08043  | 6.65705  | 250.89793 |
|                   | $n_{HB} = 2$ | 0.69725 | 0.05945 | 0.06162  | 7.57775  | 375.1323  |
| C <sup>5</sup> -H | $n_{HB} = 0$ | 0.76939 | 0.07621 | 0.09855  | 5.25609  | 241.34802 |
|                   | $n_{HB} = 1$ | 0.774   | 0.0711  | 0.08994  | 6.91465  | 294.03505 |
|                   | $n_{HB} = 2$ | 0.73368 | 0.07587 | 0.06583  | 12.61041 | 641.65965 |

Table T5 Parameters for the exponential fit ( $C(t) = c_1 \exp(-t/\tau_1) + c_2 \exp(-t/\tau_2) + (1 - c_1 - c_2) \exp(-t/\tau_3)$ ) to the intermittent H-bond state TCFs for  $[C_4C_1im]Cl$ .

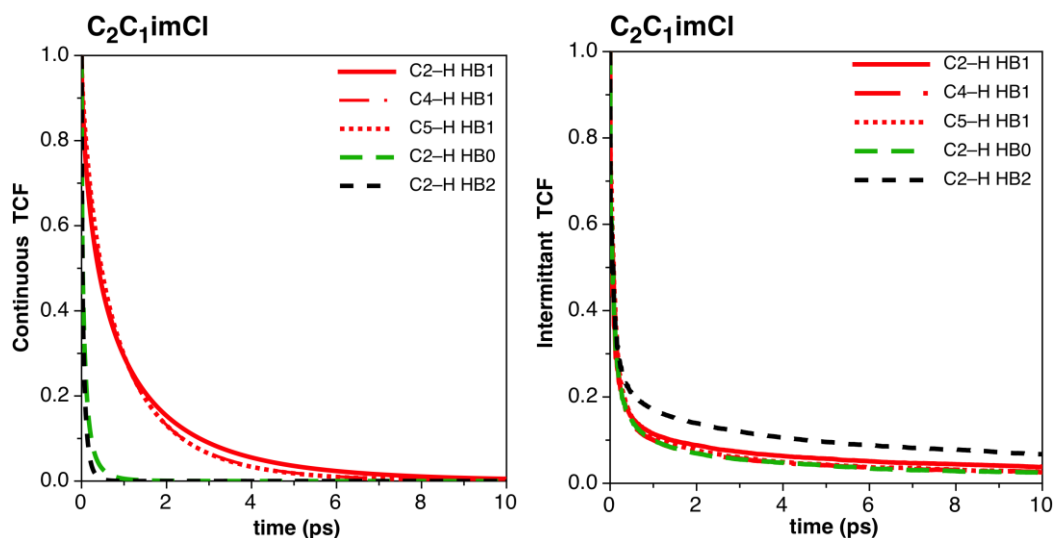

Figure F7 (a) Continuous and (b) intermittent H-bond state TCFs for  $[C_2C_1im]Cl$ .

The values presented in below correspond to numerical integrals, however since the TCF have already decayed to zero, the use of these fitting functions was not necessary. However, in order to be complete these are provided.

|                   |              | $c_1$   | $c_2$   | $\tau_1$ | $\tau_2$ | $\tau_3$ |
|-------------------|--------------|---------|---------|----------|----------|----------|
| C <sup>2</sup> -H | $n_{HB} = 0$ | 0.70974 | 0.22877 | 0.0482   | 0.60832  | 12.39304 |
|                   | $n_{HB} = 1$ | 0.76407 | 0.17152 | 0.04705  | 1.01871  | 20.77262 |
|                   | $n_{HB} = 2$ | 0.74661 | 0.15297 | 0.05391  | 1.78484  | 23.81166 |
| C <sup>4</sup> -H | $n_{HB} = 0$ | 0.76065 | 0.17145 | 0.08504  | 0.86946  | 11.40991 |
|                   | $n_{HB} = 1$ | 0.75615 | 0.18141 | 0.06754  | 0.72108  | 12.27741 |
|                   | $n_{HB} = 2$ | 0.75665 | 0.16019 | 0.04555  | 0.82393  | 18.52332 |
| C <sup>5</sup> -H | $n_{HB} = 0$ | 0.76861 | 0.16641 | 0.09406  | 1.10844  | 12.55995 |
|                   | $n_{HB} = 1$ | 0.77115 | 0.16707 | 0.07909  | 0.94601  | 12.47833 |
|                   | $n_{HB} = 2$ | 0.76395 | 0.15766 | 0.04636  | 0.86728  | 16.86652 |

Table T6 Parameters for the exponential fit ( $C(t) = c_1 \exp(-t/t_1) + c_2 \exp(-t/t_2) + (1 - c_1 - c_2) \exp(-t/t_3)$ ) to the intermittent H-bond state TCFs for  $[C_4C_1im]Cl$ .

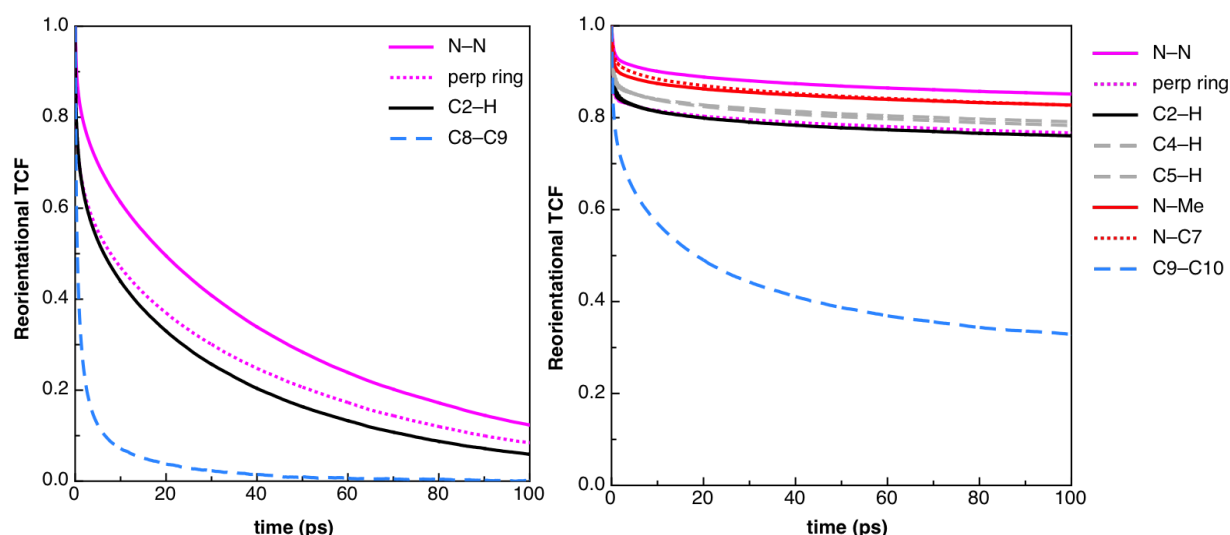

Figure F8 (a) Reorientational dynamics represented by the Legendre polynomial of rank 2 ( $l=2$ ) for  $[C_2C_{1im}]Cl$  and  $[C_4C_{1im}]Cl$ . The specific unit vectors are described in the text below.

Normalised reorientational TCFs for the cationic species have been obtained:

$$C(t) = \frac{\langle P_l \hat{u}_i(t) \cdot u_i(0) \rangle}{\langle P_l \hat{u}_i(0) \cdot u_i(0) \rangle}$$

where  $P_l$  denote the Legendre polynomial of rank  $l$ , and  $u_i$  are unit vectors, aligned along the C<sup>2</sup>-H bond (C<sup>2</sup>-H), or aligned along the vector connecting N<sup>1</sup> and N<sup>3</sup> (N-N), or aligned along the cross-product of the N-N and C<sup>2</sup>-H vectors, which is a vector perpendicular to the ring (perp ring), or along the terminal bond of the alkyl chain (C<sup>8</sup>-C<sup>9</sup>) in  $C_2C_{1im}^+$  or C<sup>9</sup>-C<sup>10</sup> in  $C_4C_{1im}^+$ , denoted C-C. The exponential fit has been taken to 500ps. Fitting was initiated from  $c_1=0.33$   $c_2=0.33$ ,  $t_1=0.1$   $t_2=10$ ,  $t_3=1000$  or 10000. Where a poor  $\chi^2$  was obtained the fit was restarted using similar values to those obtained for like fits. The "Robust" algorithm from Pro-fit package<sup>†</sup> was used, integration was undertaken using the "Analyse" feature.

| unit vector       | $c_1$ | $c_2$ | $\tau_1$ | $\tau_2$ | $\tau_3$ | $\chi^2$ |
|-------------------|-------|-------|----------|----------|----------|----------|
| C <sup>2</sup> -H | 0.33  | 0.23  | 0.39     | 9.43     | 50.26    | 0.81     |
| perp ring         | 0.32  | 0.20  | 0.34     | 9.72     | 59.60    | 0.78     |
| N-N               | 0.23  | 0.34  | 1.01     | 27.77    | 75.68    | 0.61     |
| C-C               | 0.52  | 0.36  | 0.29     | 2.09     | 19.19    | 0.08     |

Table T7 Parameters for the exponential fit ( $C(t) = c_1 \exp(-t/t_1) + c_2 \exp(-t/t_2) + (1 - c_1 - c_2) \exp(-t/t_3)$ ) to the reorientational Legendre polynomial of rank 2 ( $l=2$ ) for  $[C_2C_{1im}]Cl$ .

| unit vector       | $c_1$ | $c_2$ | $\tau_1$ | $\tau_2$ | $\tau_3$ | $\chi^2$ |
|-------------------|-------|-------|----------|----------|----------|----------|
| C <sup>2</sup> -H | 0.17  | 0.07  | 0.41     | 50.77    | 13761    | 0.17     |
| perp ring         | 0.17  | 0.07  | 0.32     | 57.34    | 15854    | 0.10     |
| N-N               | 0.09  | 0.06  | 0.81     | 52.45    | 13223    | 0.06     |
| N-C7              | 0.10  | 0.07  | 1.04     | 50.10    | 10327    | 0.10     |
| C-C               | 0.33  | 0.35  | 1.04     | 31.92    | 2458     | 1.37     |

Table T8 Parameters for the exponential fit ( $C(t) = c_1 \exp(-t/t_1) + c_2 \exp(-t/t_2) + (1 - c_1 - c_2) \exp(-t/t_3)$ ) to the reorientational Legendre polynomial of rank 2 ( $l=2$ ) for  $[C_4C_{1im}]Cl$ .

<sup>†</sup> pro Fit 6.2.11 by QuantumSoft, Bühlstr. 18, CH-8707 Uetikon am See, Switzerland

To enable a more direct comparison the time correlation functions have been evaluated on an equivalent basis below. The numerical integration time is reduced slightly due to the Legendre polynomial becoming negative before 400ps for the C<sup>2</sup>-H reorientation.

| unit vector                                                                | c <sub>1</sub> | c <sub>2</sub> | τ <sub>1</sub> | τ <sub>2</sub> | τ <sub>3</sub> | χ <sup>2</sup> | numerical to 365ps | τ □□□□ |
|----------------------------------------------------------------------------|----------------|----------------|----------------|----------------|----------------|----------------|--------------------|--------|
| l=1 C <sup>2</sup> -H                                                      | 0.14           | 0.16           | 0.65           | 17.57          | 74.82          | 3.72           | 54.88              | 56     |
| l=2 C <sup>2</sup> -H                                                      | 0.33           | 0.23           | 0.39           | 9.43           | 50.26          | 0.81           | 24.40              | 24     |
| [C <sub>4</sub> C <sub>1</sub> im]Cl<br>l=1 C <sup>2</sup> -H              | 0.06           | 0.03           | 0.49           | 58.83          | 14473          | 0.03           | 330                | 12842  |
| l=1 perp ring                                                              | 0.12           | 0.10           | 0.40           | 9.90           | 73.76          | 0.79           | 58.16              | 58     |
| l=2 perp ring                                                              | 0.32           | 0.20           | 0.34           | 9.72           | 59.60          | 0.78           | 30.54              | 31     |
| [C <sub>4</sub> C <sub>1</sub> im]Cl<br>l=1 perp ring                      | 0.06           | 0.03           | 0.36           | 57.73          | 14835          | 0.002          | 318                | 13502  |
| l=1 N <sup>1</sup> -N <sup>2</sup>                                         | 0.08           | 0.12           | 1.08           | 38.97          | 145.77         | 0.34           | 111.95             | 122    |
| l=2 N <sup>1</sup> -N <sup>2</sup>                                         | 0.23           | 0.34           | 1.01           | 27.77          | 75.68          | 0.61           | 42.42              | 42     |
| [C <sub>4</sub> C <sub>1</sub> im]Cl<br>l=1 N <sup>1</sup> -N <sup>2</sup> | 0.03           | 0.03           | 0.89           | 56.00          | 33590          | 0.001          | 343                | 31576  |
| C <sup>2</sup> -H Continuous                                               | 0.26           | 0.40           | 0.38           | 3.77           | 15.37          | 0.05           | 6.89               | 7      |
| C <sup>2</sup> -H Intermittent                                             | 0.21           | 0.50           | 0.98           | 55.12          | 383.56         | 0.55           | 95.29              | 139    |
| l=1 C-C                                                                    | 0.56           | 0.18           | 1.13           | 17.02          | 145.25         | 0.66           | 39.54              | 42     |
| l=2 C-C                                                                    | 0.52           | 0.36           | 0.29           | 2.09           | 19.19          | 0.08           | 3.11               | 3      |

Table T9 Parameters for the exponential fit ( $C(t) = c_1 \exp(-t/\tau_1) + c_2 \exp(-t/\tau_2) + (1 - c_1 - c_2) \exp(-t/\tau_3)$ ) to the reorientational Legendre polynomial of rank 1 ( $l=1$ ) for [C<sub>2</sub>C<sub>1</sub>im]Cl (unless otherwise noted) and integration parameters to produce the time constant  $\tau$ .

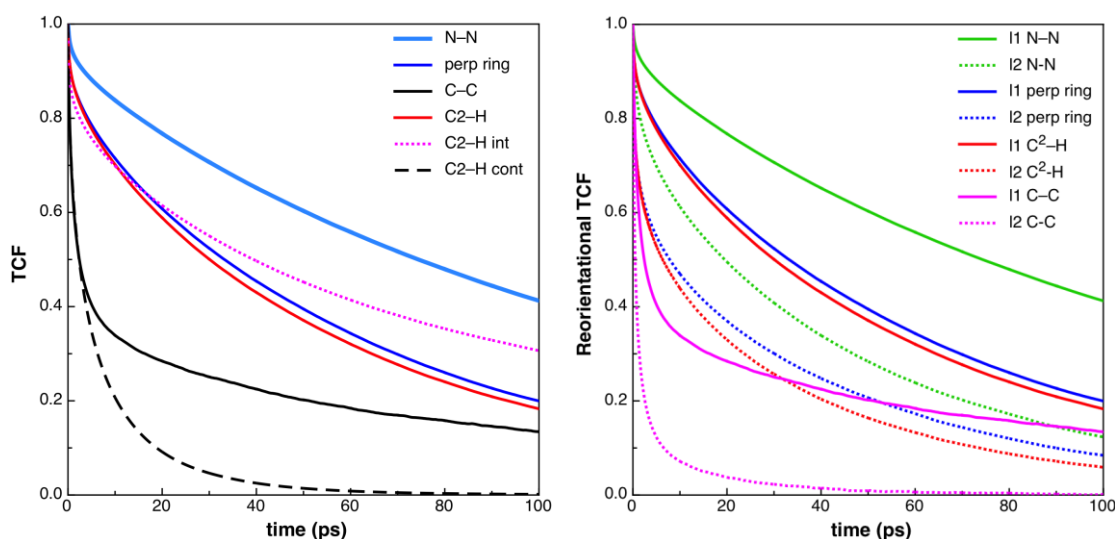

Figure F9 (a) Reorientational dynamics represented by the Legendre polynomial of rank 1 ( $l=1$ ) for [C<sub>2</sub>C<sub>1</sub>im]Cl compared with the intermittent and continuous residence TCF decay of the C<sup>2</sup>-H H-bond, (b) Comparison of the rank 1 ( $l=1$ ) and rank 2 ( $l=2$ ) reorientational Legendre time CFs
